# Supplementary material for: Facile synthesis of magnetic La–Zr composite as high effective adsorbent for fluoride removal
Source: Royal Society of Chemistry journal article supplement (doi:10.1039/c5ra27929a), 2016-01-01
Supplement: c5ra27929a1.pdf [file c5ra27929a1.pdf]

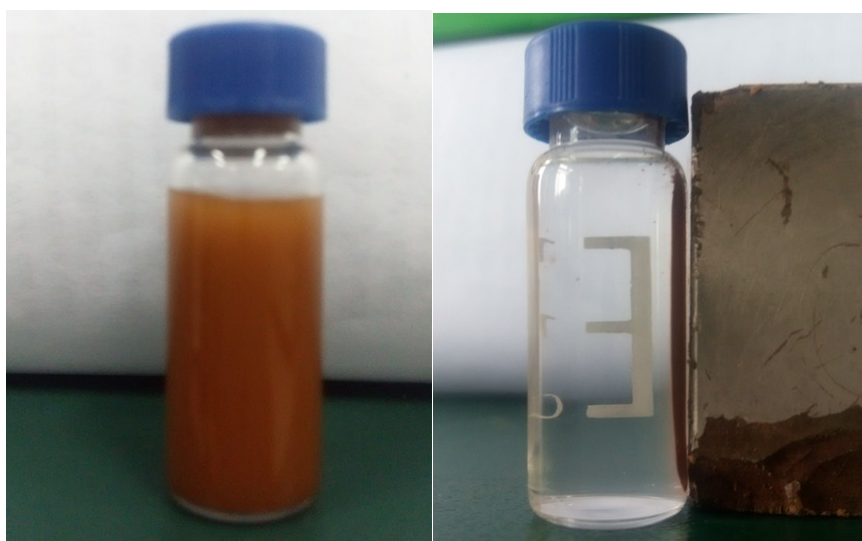

Fig. S1. The composite in the absence (left) and presence (right) of an external magnetic field

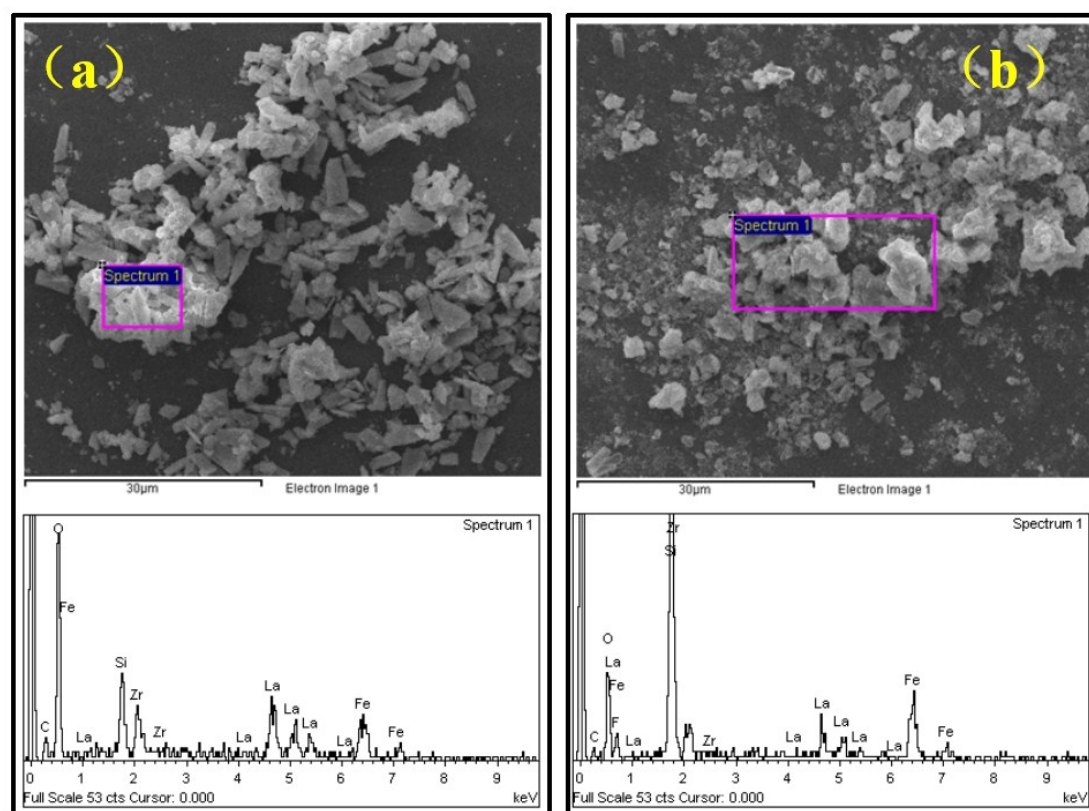

Fig. S2. (a) EDS of La-Zr magnetic composite; (b) EDS of La-Zr magnetic composite dried at 60°C after adsorbed 300 mg/L F<sup>-</sup>.

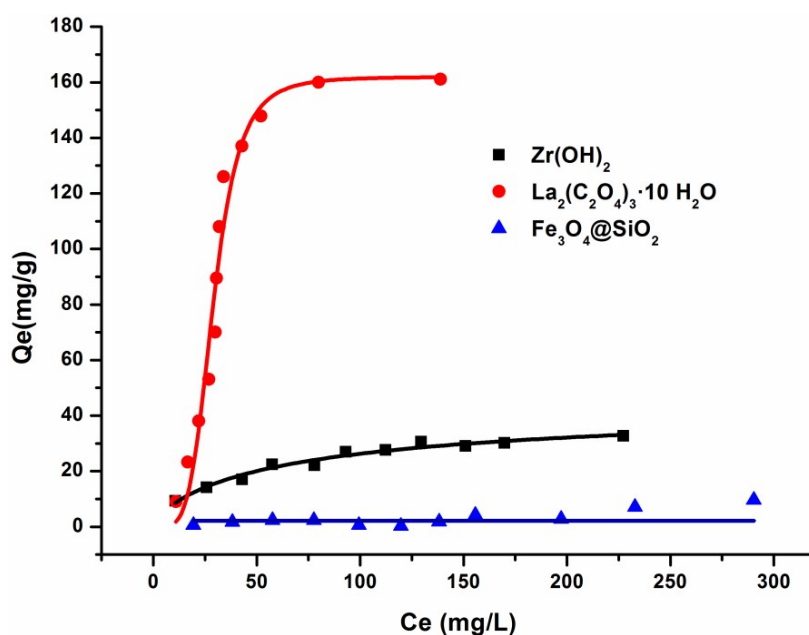

Fig. S3. Comparison between the measured and Lan-Fre isotherm modeled profiles of  $\text{ZrO}(\text{OH})_2$ ,  $\text{La}_2(\text{C}_2\text{O}_4)_3 \cdot 10 \text{H}_2\text{O}$  and  $\text{Fe}_3\text{O}_4@\text{SiO}_2$ .

$\text{ZrO}(\text{OH})_2$  was prepared with the same preparation method of La-Zr composite without adding  $\text{Fe}_3\text{O}_4@\text{SiO}_2$  and  $\text{La}(\text{NO}_3)_3$ ;  $\text{La}_2(\text{C}_2\text{O}_4)_3 \cdot 10 \text{H}_2\text{O}$  was prepared with the same preparation method of La-Zr composite without adding  $\text{Fe}_3\text{O}_4@\text{SiO}_2$ ,  $\text{ZrOCl}_2 \cdot 8\text{H}_2\text{O}$  and  $\text{NH}_3 \cdot \text{H}_2\text{O}$ .

Adsorption isotherms were studied in the same conditions as La-Zr composite. The data fitting to Lan-Fra isotherm model are shown in Fig. S3. Regression coefficient ( $R^2$ ) of  $\text{ZrO}(\text{OH})_2$  is 0.9655, and the maximum calculated sorption capacity is 46.50 g/mg; Regression coefficient ( $R^2$ ) of  $\text{La}_2(\text{C}_2\text{O}_4)_3 \cdot 10 \text{H}_2\text{O}$  is 0.9604, and the maximum calculated sorption capacity is 161.95 g/mg; The data of  $\text{Fe}_3\text{O}_4@\text{SiO}_2$  can not be fitted to Lan-Fre model, and can not be fitted to Langmuir or Fredunlich models as well. The adsorption capacity of the composite is considered mainly comes from  $\text{La}_2(\text{C}_2\text{O}_4)_3 \cdot 10 \text{H}_2\text{O}$  due to its high adsorption capacity toward  $\text{F}^-$ . But it is too expensive to use bare La compound as adsorbent since La is a rare earth element.  $\text{ZrO}(\text{OH})_2$  is a chemically inert and highly biocompatible material with low cost<sup>1-4</sup>. Furthermore, one can see from Fig. S3 it has medium adsorption capacity toward  $\text{F}^-$ . Consequently, it is an ideal component used to compose with La compound to cheapen the adsorbent while retain high adsorption ability. In addition, biocompatibility of  $\text{ZrO}(\text{OH})_2$  will significantly decrease the second contamination to environment, even if the composite were ineffectively recovered after used as adsorbent<sup>1-2</sup>. Adsorption ability of  $\text{Fe}_3\text{O}_4@\text{SiO}_2$  is too low to make any sense for

adsorbing  $F^-$  in the composite. Its function is to endow magnetism to the composite facilitating operation.

Table S2 Comparison the La-Zr composite with two other reported adsorbents with better adsorption records

| Adsorbent                          | Preparation method                                                                                               | The maximum adsorption ability (mg/g) | Best fitted isotherm model | Best fitted kinetic model         | Reference                                |
|------------------------------------|------------------------------------------------------------------------------------------------------------------|---------------------------------------|----------------------------|-----------------------------------|------------------------------------------|
| La-Zr composite                    | Co-precipitated $La_2(C_2O_4)_3$ and $ZrO(OH)_2$ at the presence of nano $Fe_3O_4@SiO_2$                         | 88.5                                  | Lan-Fre isotherm model     | Pseudo-second-order kinetic model | This study                               |
| Nano zirconium chitosan composite  | synthesized Zr nanoparticles using aqueous extract of Aloevera, and then composed it with chitosan by embedding. | 96.58                                 | Langmuir isotherm model    | Pseudo-second order model         | J. Hazard. Mater., 276 (2014) 232-240    |
| Calcined MgAl-CO <sub>3</sub> LDHs | Calcined MgAl-CO <sub>3</sub> layered double hydroxides at 500 °C for 2 h.                                       | 141.64                                | No study                   | pseudo-second-order kinetic model | Ind. Eng. Chem. Res. 2006, 45, 8623-8628 |

The preparation scheme of the composite adsorbent

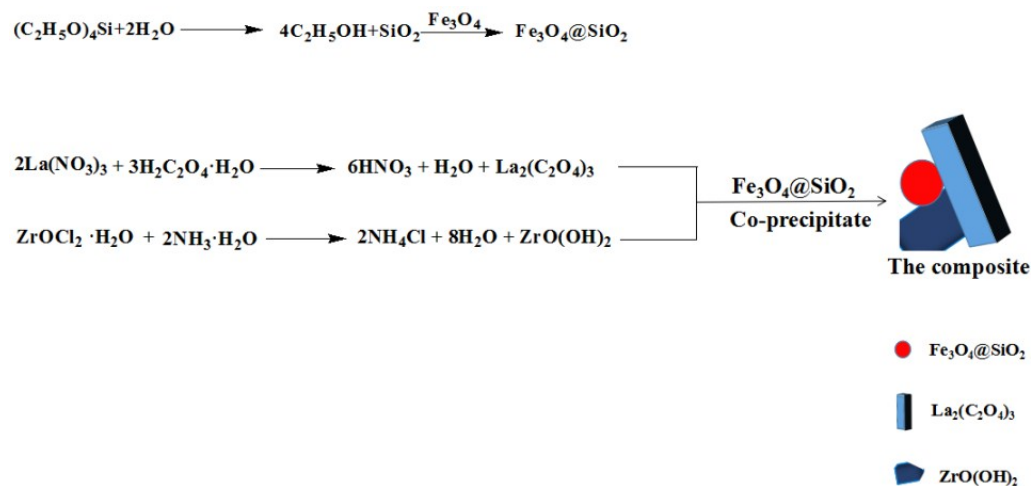

## Reference

1. Hualin Jiang, Pinghua Chen, Shenglian Luo et al., Synthesis of novel nanocomposite  $Fe_3O_4/ZrO_2$ /chitosan and its application for removal of nitrate and phosphate, Appl. Surf. Sci. 2013, 284: 942-949;
2. Hualin Jiang, Pinghua Chen, Shenglian Luo et al., Synthesis of Novel Biocompatible Composite  $Fe_3O_4/ZrO_2$ / Chitosan and Its Application for Dye Removal, J. Inorg. Organomet. Polym. 2013, 23:393-400;
3. L. Kljajević, B. Matović, A. Radosavljević-Mihajlović, et al., Preparation of  $ZrO_2$  and  $ZrO_2/SiC$  powders by carbothermal reduction of  $ZrSiO_4$ , J. Alloy. Compd. 2011, 509: 2203-2215;
4. A. Wael, Y. Nao-Daniel, W. Martin, S. Witkowski, et al., Influence of preparation and wall thickness on the resistance to fracture of zirconia implant abutments, Clin. Implant Dent. R. 2012, 14: 196-203.
